# Supplementary material for: Remnant of Unrelated Amniote Sex Chromosomal Linkage Sharing on the Same Chromosome in House Gecko Lizards, Providing a Better Understanding of the Ancestral Super-Sex Chromosome
Source: MDPI journal article supplement (doi:10.3390/cells10112969), 2021-11-01
Supplement: s1 [file s1]

**Table S1** List of chicken and zebra finch BACs mapped to the common house gecko (*Hemidactylus frenatus*, HFR) (Duméril and Bibron, 1836) and the flat-tailed house gecko (*Hemidactylus platyurus*, HPL) (Schneider, 1797) chromosomes, compared with Siamese cobra (*Naja kaouthia*, NKA) (Lesson, 1797), Russell’s viper (*Daboia russelii*, DRU) (Shaw and Nodder, 1797), the common tiger snake (*Notechis scutatus*, NSC) (Peters, 1861), green iguana (*Iguana iguana*, IIG) (Linnaeus, 1758), common garden lizard (*Calotes versicolor*, CVE) (Daudin, 1802), water monitor lizard (*Varanus salvator macromaculatus*, VSA) (Deraniyagala, 1944), with their chromosomal location in chicken (*Gallus gallus*, GGA) (Linnaeus, 1758).

| Name          | GGA | NKA             | NSC | DRU | IIG | CVE | VSA   | HFR | HPL |
|---------------|-----|-----------------|-----|-----|-----|-----|-------|-----|-----|
| CH261-107E2   | 1q  | -               | -   | -   | -   | -   | -     | -   | -   |
| CH261-118M1   | 1q  | -               | -   | -   | -   | 3   | -     | -   | 2   |
| CH261-168O17  | 1q  | -               | -   | -   | -   | -   | -     | -   | -   |
| CH261-184E5   | 1q  | micro           | -   | -   | -   | 3   | -     | -   | 5   |
| CH261-18J16   | 1q  | micro           | -   | -   | -   | -   | micro | -   | -   |
| CH261-58K12   | 1q  | -               | -   | -   | -   | -   | -     | -   | -   |
| CH261-36B5    | 1   | micro           | -   | -   | -   | -   | -     | -   | 13  |
| TGMCBA-167P13 | 1   | Wq              | W   | W   | -   | -   | -     | -   | 2   |
| CH261-89C18   | 1p  | Wq              | -   | -   | -   | -   | -     | -   | -   |
| CH261-98G4    | 1q  | -               | -   | W   | -   | -   | 5     | -   | -   |
| CH261-123O22  | 2p  | -               | Z   | -   | 6   | -   | 4     | -   | 3   |
| CH261-177K1   | 2p  | Z               | -   | -   | -   | -   | -     | -   | -   |
| CH261-169N6   | 2p  | -               | -   | -   | -   | -   | 4     | -   | -   |
| CH261-44D16   | 2q  | -               | 3   | 3   | -   | 4   | 7     | -   | 4   |
| CH261-18C6    | 4   | 1q and<br>micro | -   | -   | -   | -   | -     | -   | 2   |
| CH261-71L6    | 4   | Wq              | -   | W   | -   | -   | -     | -   | -   |
| CH261-83E1    | 4p  | -               | -   | -   | -   | -   | -     | -   | -   |
| CH261-89P6    | 4q  | -               | -   | -   | -   | -   | -     | -   | -   |
| CH261-122F8   | 5   | -               | 1q  | 1q  | -   | 1   | -     | -   | -   |
| CH261-2I23    | 5   | 1q              | -   | -   | -   | 1   | 2q    | -   | -   |
| CH261-49B22   | 5p  | 1q and<br>micro | -   | -   | -   | -   | -     | -   | -   |
| CH261-78F13   | 5q  | -               | -   | -   | -   | -   | 2q    | -   | -   |

|               |     |       |       |      |        |         |       |   |         |
|---------------|-----|-------|-------|------|--------|---------|-------|---|---------|
| TGMCBA-145C6  | 5   | 1q    | -     | -    | -      | 1       | 4     | - | -       |
| TGMCBA-24C1   | 5   | -     | -     | -    | -      | 1       | -     | - | 3       |
| CH261-49F3    | 6q  | -     | -     | -    | 3      | -       | -     | - | -       |
| TGMCBA-382J4  | 6p  | -     | -     | -    | 3      | -       | -     | - | -       |
| CH261-183N19  | 9p  | micro | -     | -    | -      | -       | -     | - | -       |
| CH261-187M16  | 9q  | micro | -     | -    | -      | -       | micro | - | -       |
| CH261-68O18   | 9   | -     | -     | -    | -      | 3       | -     | - | -       |
| CH261-95N3    | 9   | Wq    | 6     | 6, W | -      | 3       | -     | - | -       |
| TGMCBA-150E19 | 9   | -     | -     | -    | 3      | 3       | -     | - | -       |
| TGMCBA-217A3  | 9   | -     | -     | -    | -      | -       | -     | - | -       |
| TGMCBA-321L6  | 9   | -     | -     | W    | 3      | -       | -     | - | -       |
| CH261-115I12  | 13p | -     | -     | -    | -      | -       | -     | - | -       |
| CH261-11H24   | 13  | -     | -     | -    | micro? | -       | 1q    | - | -       |
| CH261-59M8    | 13  | -     | -     | -    | -      | 2q      | -     | - | -       |
| TGMCBA-136I12 | 13  | -     | -     | -    | -      | 2q      | 1q    | - | 2       |
| TGMCBA-266O5  | 13  | -     | -     | -    | 2q     | -       | 1q    | - | -       |
| TGMCBA-321B13 | 13q | -     | -     | -    | 2q     | 2q      | -     | - | -       |
| CH261-40D6    | 15  | micro | micro | -    | -      | 2 and 3 | -     | - | -       |
| CH261-48M1    | 15  | -     | micro | -    | micro  | micro   | -     | - | -       |
| CH261-90P23   | 15p | micro | -     | -    | micro  | micro   | -     | - | -       |
| TGMCBA-231D20 | 15  | -     | -     | -    | -      | -       | -     | - | -       |
| TGMCBA-266G23 | 15q | micro | -     | -    | -      | -       | -     | - | -       |
| CH261-113A7   | 17  | -     | -     | -    | -      | -       | -     | - | -       |
| CH261-42P16   | 17q | -     | -     | -    | -      | -       | -     | - | -       |
| CH261-69M11   | 17  | micro | -     | -    | -      | -       | -     | - | -       |
| TGMCBA-185B22 | 17  | -     | -     | -    | -      | -       | -     | - | -       |
| TGMCBA-197G19 | 17  | -     | -     | -    | -      | -       | -     | - | -       |
| TGMCBA-375I5  | 17p | Wq    | W     | W    | -      | micro   | -     | - | 1 and 5 |
| TGMCBA-67H23  | 17  | Wq    | W     | W    | -      | -       | -     | - | -       |
| CH261-60N6    | 18p | -     | -     | -    | -      | -       | -     | - | 5       |
| CH261-72B18   | 18q | -     | -     | -    | -      | -       | -     | - | -       |
| CH261-105P1   | 23  | micro | -     | -    | -      | -       | -     | - | -       |

|               |     |              |       |   |        |       |    |   |   |
|---------------|-----|--------------|-------|---|--------|-------|----|---|---|
| CH261-191G17  | 23p | micro        | -     | - | -      | -     | -  | - | - |
| CH261-49G9    | 23  | micro        | -     | - | -      | -     | -  | - | - |
| CH261-90K11   | 23q | -            | micro | - | -      | micro | -  | - | - |
| TGMCBA-173N15 | 23  | micro        | -     | - | -      | -     | -  | - | - |
| TGMCBA-227A15 | 23  | Wq           | W     | - | -      | -     | -  | - | - |
| TGMCBA-272G9  | 23  | -            | -     | - | -      | -     | -  | - | 1 |
| TGMCBA-48O8   | 23  | micro        | -     | - | -      | -     | -  | - | - |
| CH261-100E5   | 27  | -            | -     | - | -      | 6     | -  | - | - |
| CH261-28L10   | 27q | -            | -     | - | -      | -     | 4  | - | 1 |
| CH261-66M16   | 27p | Z            | -     | - | -      | -     | 4  | - | - |
| TGMCBA-23C5   | 27  | Zq and<br>Wq | W     | - | -      | -     | -  | - | - |
| TGMCBA-324P4  | 27  | -            | -     | - | -      | -     | -  | - | - |
| CH261-101C8   | 28  | -            | -     | - | -      | -     | -  | - | - |
| CH261-186C5   | 28  | -            | -     | - | -      | -     | -  | - | - |
| CH261-64A15   | 28p | micro        | -     | - | -      | -     | -  | - | - |
| CH261-72A10   | 28q | micro        | -     | - | -      | -     | -  | - | - |
| CH261-129A16  | Zp  | Wq           | -     | - | micro? | -     | 1p | - | - |
| CH261-133M4   | Zq  | 2q           | 2p, W | - | 2p     | 2p    | 1p | - | - |
| CH261-137F19  | Z   | -            | -     | - | -      | -     | -  | - | - |
| TGMCBA-200J22 | Z   | Wq           | W     | - | -      | -     | -  | - | - |
| TGMCBA-270I9  | Z   | 2q           | W     | W | -      | -     | 1p | - | - |

---
